# Supplementary material for: Challenge Demands and Resilience
Source: Atypon-hosted journal article supplement (doi:10.1026/0932-4089/a000363), 2021-07-29

Figure E1. Results of supplementary analyses without controlling for covariates.

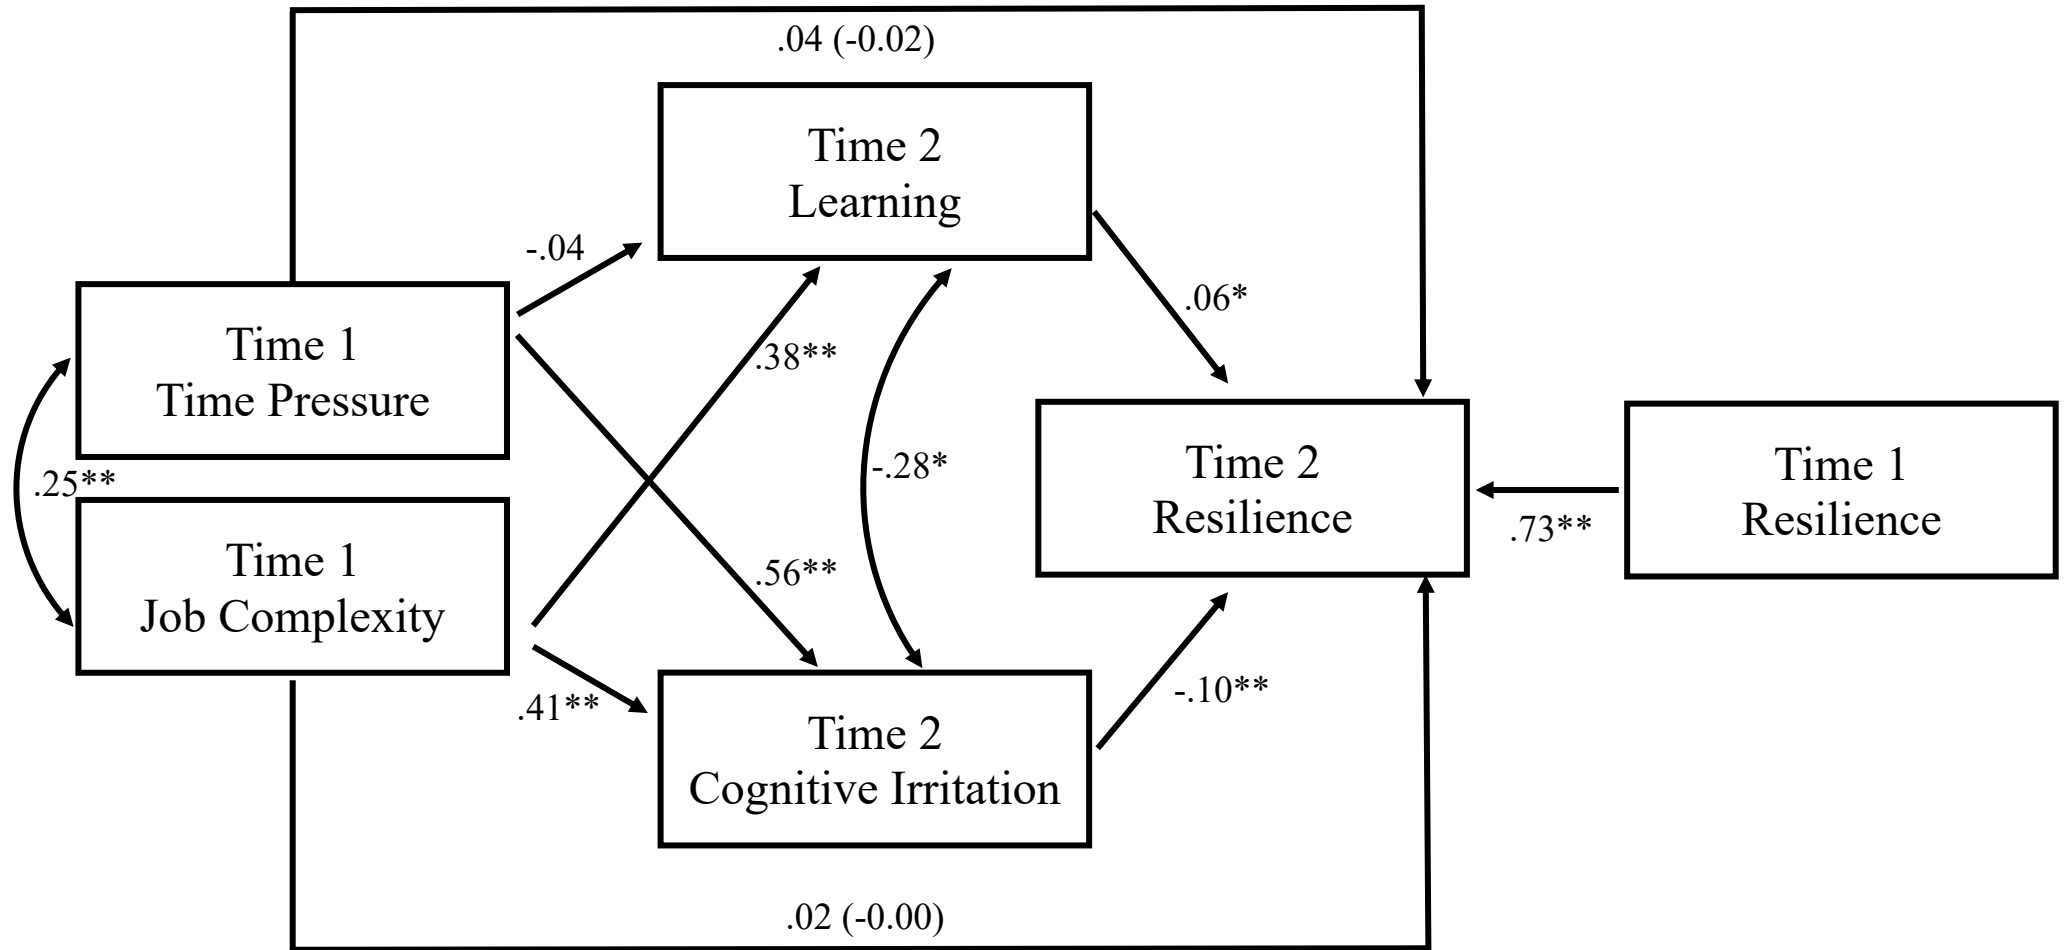

Note: This figure shows unstandardized estimates. The estimates in parentheses indicate the total relationships between time pressure and job complexity on resilience.  $*p < .05$ ,  $**p < .001$

Figure E2. Plotted quadratic effect of job complexity on learning.

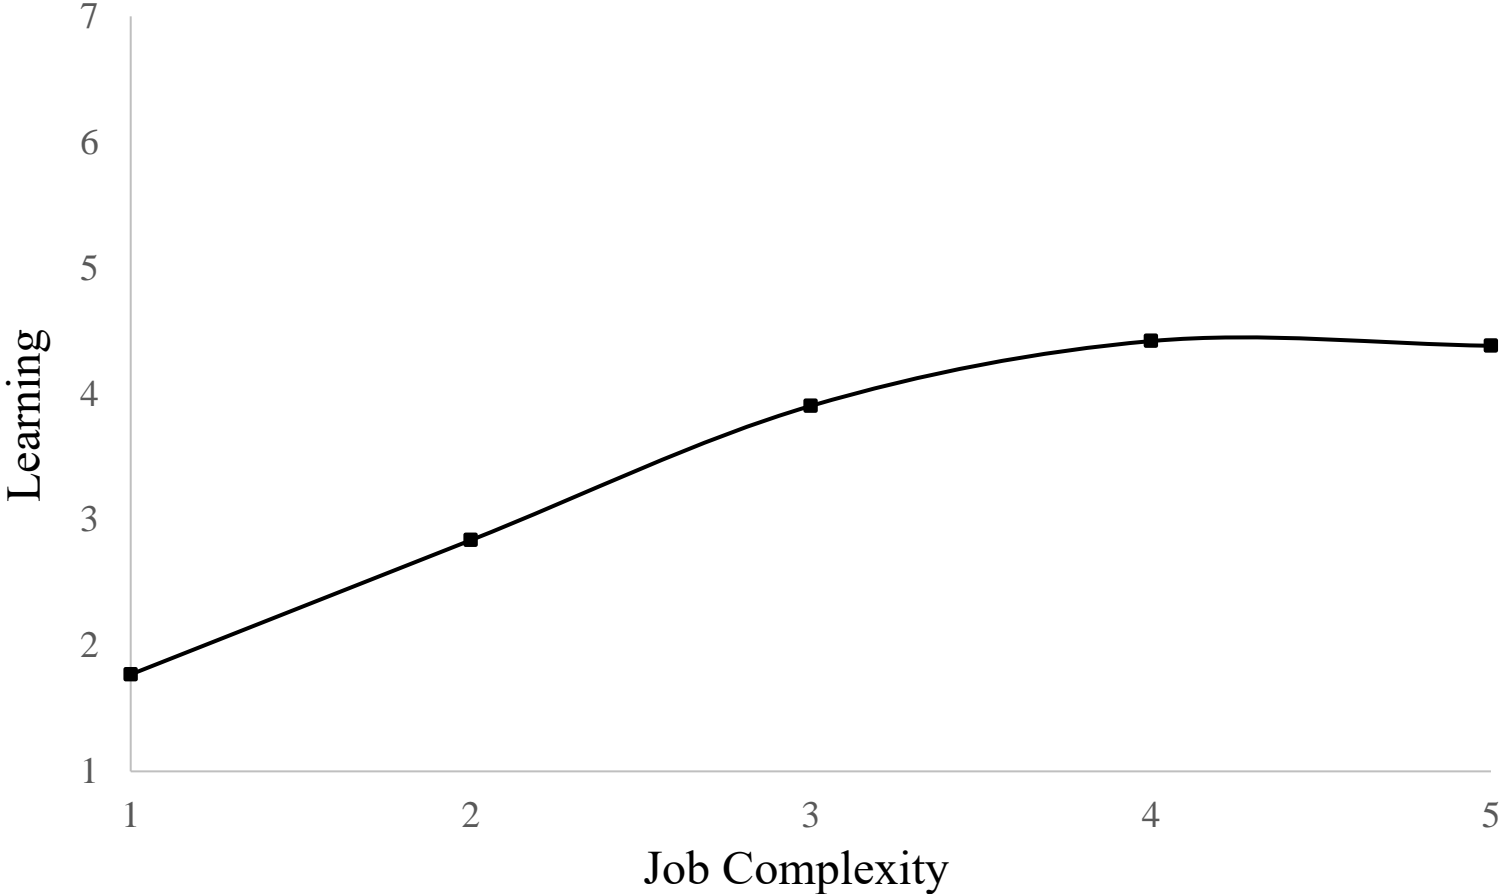

Supplement: 0932-4089_a000363_esm1.pdf [file 0932-4089_a000363_esm1.pdf]
