# Supplementary material for: Challenge Demands and Resilience
Source: Atypon-hosted journal article supplement (doi:10.1026/0932-4089/a000363), 2021-07-29
Supplement: 0932-4089_a000363_esm2.pdf [file 0932-4089_a000363_esm2.pdf]

Table E1

*Supplementary Analyses of Indirect and Total Effects from Bayesian Time-Lagged Path Model without control variables.*

|                                             | Estimate(PSD) | Bayesian 95% CI |      |
|---------------------------------------------|---------------|-----------------|------|
|                                             |               | LL              | UL   |
| <b>a-paths</b>                              |               |                 |      |
| T1 Time Pressure → T2 Learning              | -.04(.09)     | -.19            | .12  |
| T1 Time Pressure → T2 Cognitive Irritation  | .56(.12)**    | .33             | .78  |
| T1 Job Complexity → T2 Learning             | .38(.09)**    | .23             | .62  |
| T1 Job Complexity → T2 Cognitive Irritation | .41(.12)**    | .17             | .63  |
| <b>b-paths</b>                              |               |                 |      |
| T2 Learning → T2 Resilience                 | .06(.03)*     | .01             | .12  |
| T2 Cognitive Irritation → T2 Resilience     | -.10(.02)**   | -.13            | -.06 |
| <b>Stability</b>                            |               |                 |      |
| R1 Resilience → R2 Resilience               | .73(.03)**    | .67             | .80  |
| <b>Covariations</b>                         |               |                 |      |
| T1 Time Pressure ↔ T1 Job Complexity        | .25(.04)*     | .19             | .35  |
| T2 Learning ↔ T2 Cognitive Irritation       | -.28(.11)*    | -.51            | -.10 |
| <b>Direct Effects</b>                       |               |                 |      |
| T1 Time Pressure → T2 Resilience            | .04(.04)      | -.05            | .12  |
| T1 Job Complexity → T2 Resilience           | .02(.04)      | -.04            | .11  |

Table E1

*(Continued)*

| <b>Indirect Effects</b>                                |             |      |      |
|--------------------------------------------------------|-------------|------|------|
| T1 Time Pressure → T2 Learning → T2 Resilience         | -.00(.01)   | -.02 | .01  |
| T1 Time Pressure → T2 Cog. Irritation → T2 Resilience  | -.05(.02)** | -.10 | -.03 |
| T1 Job Complexity → T2 Learning → T2 Resilience        | .02(.01)*   | .003 | .05  |
| T1 Job Complexity → T2 Cog. Irritation → T2 Resilience | -.04(.01)** | -.08 | -.02 |
| <b>Total Effects</b>                                   |             |      |      |
| T1 Time Pressure → T2 Resilience                       | -.02(.04)   | -.11 | .05  |
| T1 Job Complexity → T2 Resilience                      | -.00(.04)   | -.07 | .08  |

*Note.* The table shows unstandardized estimates. CI = confidence interval; LL = lower limit, UL = upper limit. \* $p < .05$ , \*\* $p < .001$  (two-sided testing).
